# Supplementary material for: Subchronic Toxicity of Microcystin-LR on Young Frogs (Xenopus laevis) and Their Gut Microbiota
Source: Front Microbiol. 2022 May 12;13:895383. doi: 10.3389/fmicb.2022.895383 (PMC9134123; doi:10.3389/fmicb.2022.895383)
Supplement: Supplementary Table 1 — Source data for the intestinal villus height and percentage of T cells in the liver of Xenopus laevis. [file Table_1.XLSX]

## Sheet: Intestinal villus height
Group	Repeatment	Intestinal villus height（mm）
C0	C0-1	0.168915
C0	C0-2	0.17522
C0	C0-3	0.171455
C0	C0-4	0.061013
C0	C0-5	0.068505
C1	C1-1	0.072971
C1	C1-2	0.066331
C1	C1-3	0.083097
C1	C1-4	0.102092
C1	C1-5	0.091298
C5	C5-1	0.3777
C5	C5-2	0.171763
C5	C5-3	0.141519
C5	C5-4	0.127532
C5	C5-5	0.108299
C20	C20-1	0.119916
C20	C20-2	0.094423
C20	C20-3	0.120725
C20	C20-4	0.131301
C20	C20-5	0.11749
C50	C50-1	0.507319
C50	C50-2	0.258577
C50	C50-3	0.249625
C50	C50-4	0.137141
C50	C50-5	0.164532

## Sheet: Percentage of T cells
Group	Repeatment	Percentage of T cells
C0	C0-1	0.0852713
C0	C0-2	0.047619
C0	C0-3	0.0508475
C0	C0-4	0.0536913
C0	C0-5	0.08
C1	C1-1	0.169231
C1	C1-2	0.204724
C1	C1-3	0.193182
C1	C1-4	0.152381
C1	C1-5	0.146341
C5	C5-1	0.198473
C5	C5-2	0.233083
C5	C5-3	0.278195
C5	C5-4	0.192661
C5	C5-5	0.285714
C20	C20-1	0.291262
C20	C20-2	0.333333
C20	C20-3	0.337209
C20	C20-4	0.290598
C20	C20-5	0.338235
C50	C50-1	0.382609
C50	C50-2	0.34375
C50	C50-3	0.367347
C50	C50-4	0.382353
C50	C50-5	0.348624
